# Supplementary material
Source: PubMed Central journal article supplement (PMC8063720)
Supplement: NIHMS1687704-supplement-Supplemental_1.pdf [file NIHMS1687704-supplement-Supplemental_1.pdf]

## Motion Sickness Questionnaire

Hi there! Thank you for taking the time to fill out our survey. We are a UCI research team investigating the heritability of motion sickness. Please fill the short survey below to help us gather information about you and your family's experience with motion sickness. It will take 15 minutes to complete and you will be eligible to win a \$35 Amazon gift card! Chances of winning are no less than 1 in 33 people.

**What is your email? This will be used for raffle prize giveaway, your email will be recorded separate from the rest of the survey so your answers will stay anonymous.**

**1. Please state your age.**

**2. What is your gender?**

- Male  
 Female

[reset](#)

**3. What is your current occupation?**

**4. Do you regard yourself as susceptible to motion sickness?**

- Not at all  
 Slightly  
 Moderately  
 Very much so

[reset](#)

### Section A: Your CHILDHOOD Experience

**5. For each of the following types of transport or entertainment please indicate: As a child (before age 12), how often you Travelled or experienced:**

**Cars**

- Never  
 1 to 4 trips  
 5 to 10 trips  
 11+ trips

[reset](#)

**Busses or Coaches**

- Never  
 1 to 4 trips  
 5 to 10 trips  
 11+ trips

[reset](#)

**Trains**

- Never  
 1 to 4 trips  
 5 to 10 trips  
 11+ trips

[reset](#)

|                                                                                                                                                                                                                        |                                                                                                                                                                    |                       |
|------------------------------------------------------------------------------------------------------------------------------------------------------------------------------------------------------------------------|--------------------------------------------------------------------------------------------------------------------------------------------------------------------|-----------------------|
| <b>Aircraft</b>                                                                                                                                                                                                        | <input type="radio"/> Never<br><input type="radio"/> 1 to 4 trips<br><input type="radio"/> 5 to 10 trips<br><input type="radio"/> 11+ trips                        | <a href="#">reset</a> |
| <b>Small boats</b>                                                                                                                                                                                                     | <input type="radio"/> Never<br><input type="radio"/> 1 to 4 trips<br><input type="radio"/> 5 to 10 trips<br><input type="radio"/> 11+ trips                        | <a href="#">reset</a> |
| <b>Ships e.g. Channel Ferries</b>                                                                                                                                                                                      | <input type="radio"/> Never<br><input type="radio"/> 1 to 4 trips<br><input type="radio"/> 5 to 10 trips<br><input type="radio"/> 11+ trips                        | <a href="#">reset</a> |
| <b>Swings</b>                                                                                                                                                                                                          | <input type="radio"/> Never<br><input type="radio"/> 1 to 4 trips<br><input type="radio"/> 5 to 10 trips<br><input type="radio"/> 11+ trips                        | <a href="#">reset</a> |
| <b>Roundabouts: playgrounds</b>                                                                                                                                                                                        | <input type="radio"/> Never<br><input type="radio"/> 1 to 4 trips<br><input type="radio"/> 5 to 10 trips<br><input type="radio"/> 11+ trips                        | <a href="#">reset</a> |
| <b>Funfair Rides, Big Dippers</b>                                                                                                                                                                                      | <input type="radio"/> Never<br><input type="radio"/> 1 to 4 trips<br><input type="radio"/> 5 to 10 trips<br><input type="radio"/> 11+ trips                        | <a href="#">reset</a> |
| <b>Section A: Your CHILDHOOD Experience</b><br><b>For each of the following types of transport or entertainment please indicate:</b><br><b>6. As a child (before age 12), how often you felt sick or nauseated in:</b> |                                                                                                                                                                    |                       |
| <b>Cars</b>                                                                                                                                                                                                            | <input type="radio"/> Never<br><input type="radio"/> Rarely<br><input type="radio"/> Sometimes<br><input type="radio"/> Frequently<br><input type="radio"/> Always | <a href="#">reset</a> |
|                                                                                                                                                                                                                        |                                                                                                                                                                    |                       |

|                                   |                                                                                                                                                                    |                       |
|-----------------------------------|--------------------------------------------------------------------------------------------------------------------------------------------------------------------|-----------------------|
| <b>Busses or Coaches</b>          | <input type="radio"/> Never<br><input type="radio"/> Rarely<br><input type="radio"/> Sometimes<br><input type="radio"/> Frequently<br><input type="radio"/> Always | <a href="#">reset</a> |
| <b>Trains</b>                     | <input type="radio"/> Never<br><input type="radio"/> Rarely<br><input type="radio"/> Sometimes<br><input type="radio"/> Frequently<br><input type="radio"/> Always | <a href="#">reset</a> |
| <b>Aircraft</b>                   | <input type="radio"/> Never<br><input type="radio"/> Rarely<br><input type="radio"/> Sometimes<br><input type="radio"/> Frequently<br><input type="radio"/> Always | <a href="#">reset</a> |
| <b>Small boats</b>                | <input type="radio"/> Never<br><input type="radio"/> Rarely<br><input type="radio"/> Sometimes<br><input type="radio"/> Frequently<br><input type="radio"/> Always | <a href="#">reset</a> |
| <b>Ships e.g. Channel Ferries</b> | <input type="radio"/> Never<br><input type="radio"/> Rarely<br><input type="radio"/> Sometimes<br><input type="radio"/> Frequently<br><input type="radio"/> Always | <a href="#">reset</a> |
| <b>Swings</b>                     | <input type="radio"/> Never<br><input type="radio"/> Rarely<br><input type="radio"/> Sometimes<br><input type="radio"/> Frequently<br><input type="radio"/> Always | <a href="#">reset</a> |
| <b>Roundabouts: Playgrounds</b>   | <input type="radio"/> Never<br><input type="radio"/> Rarely<br><input type="radio"/> Sometimes<br><input type="radio"/> Frequently<br><input type="radio"/> Always | <a href="#">reset</a> |
|                                   |                                                                                                                                                                    |                       |

|                                   |                                                                                                                                                                    |                       |
|-----------------------------------|--------------------------------------------------------------------------------------------------------------------------------------------------------------------|-----------------------|
| <b>Funfair Rides, Big Dippers</b> | <input type="radio"/> Never<br><input type="radio"/> Rarely<br><input type="radio"/> Sometimes<br><input type="radio"/> Frequently<br><input type="radio"/> Always | <a href="#">reset</a> |
|-----------------------------------|--------------------------------------------------------------------------------------------------------------------------------------------------------------------|-----------------------|

**Section A: Your CHILDHOOD Experience**  
**For each of the following types of transport or entertainment please indicate:**  
**7. As a child (before age 12), how often you vomited in:**

|             |                                                                                                                                                                    |                       |
|-------------|--------------------------------------------------------------------------------------------------------------------------------------------------------------------|-----------------------|
| <b>Cars</b> | <input type="radio"/> Never<br><input type="radio"/> Rarely<br><input type="radio"/> Sometimes<br><input type="radio"/> Frequently<br><input type="radio"/> Always | <a href="#">reset</a> |
|-------------|--------------------------------------------------------------------------------------------------------------------------------------------------------------------|-----------------------|

|                          |                                                                                                                                                                    |                       |
|--------------------------|--------------------------------------------------------------------------------------------------------------------------------------------------------------------|-----------------------|
| <b>Busses or Coaches</b> | <input type="radio"/> Never<br><input type="radio"/> Rarely<br><input type="radio"/> Sometimes<br><input type="radio"/> Frequently<br><input type="radio"/> Always | <a href="#">reset</a> |
|--------------------------|--------------------------------------------------------------------------------------------------------------------------------------------------------------------|-----------------------|

|               |                                                                                                                                                                    |                       |
|---------------|--------------------------------------------------------------------------------------------------------------------------------------------------------------------|-----------------------|
| <b>Trains</b> | <input type="radio"/> Never<br><input type="radio"/> Rarely<br><input type="radio"/> Sometimes<br><input type="radio"/> Frequently<br><input type="radio"/> Always | <a href="#">reset</a> |
|---------------|--------------------------------------------------------------------------------------------------------------------------------------------------------------------|-----------------------|

|                  |                                                                                                                                                                    |                       |
|------------------|--------------------------------------------------------------------------------------------------------------------------------------------------------------------|-----------------------|
| <b>Aircrafts</b> | <input type="radio"/> Never<br><input type="radio"/> Rarely<br><input type="radio"/> Sometimes<br><input type="radio"/> Frequently<br><input type="radio"/> Always | <a href="#">reset</a> |
|------------------|--------------------------------------------------------------------------------------------------------------------------------------------------------------------|-----------------------|

|                    |                                                                                                                                                                    |                       |
|--------------------|--------------------------------------------------------------------------------------------------------------------------------------------------------------------|-----------------------|
| <b>Small Boats</b> | <input type="radio"/> Never<br><input type="radio"/> Rarely<br><input type="radio"/> Sometimes<br><input type="radio"/> Frequently<br><input type="radio"/> Always | <a href="#">reset</a> |
|--------------------|--------------------------------------------------------------------------------------------------------------------------------------------------------------------|-----------------------|

|  |  |  |
|--|--|--|
|  |  |  |
|--|--|--|

|                                                                                                               |                                                                                                                                                                                                                                                     |
|---------------------------------------------------------------------------------------------------------------|-----------------------------------------------------------------------------------------------------------------------------------------------------------------------------------------------------------------------------------------------------|
| <p><b>Ships e.g. Channel Ferries</b></p>                                                                      | <p> <input type="radio"/> Never<br/> <input type="radio"/> Rarely<br/> <input type="radio"/> Sometimes<br/> <input type="radio"/> Frequently<br/> <input type="radio"/> Always         </p> <p style="text-align: right;"><a href="#">reset</a></p> |
| <p><b>Swings</b></p>                                                                                          | <p> <input type="radio"/> Never<br/> <input type="radio"/> Rarely<br/> <input type="radio"/> Sometimes<br/> <input type="radio"/> Frequently<br/> <input type="radio"/> Always         </p> <p style="text-align: right;"><a href="#">reset</a></p> |
| <p><b>Roundabouts: playgrounds</b></p>                                                                        | <p> <input type="radio"/> Never<br/> <input type="radio"/> Rarely<br/> <input type="radio"/> Sometimes<br/> <input type="radio"/> Frequently<br/> <input type="radio"/> Always         </p> <p style="text-align: right;"><a href="#">reset</a></p> |
| <p><b>Funfair Rides, Big Dippers</b></p>                                                                      | <p> <input type="radio"/> Never<br/> <input type="radio"/> Rarely<br/> <input type="radio"/> Sometimes<br/> <input type="radio"/> Frequently<br/> <input type="radio"/> Always         </p> <p style="text-align: right;"><a href="#">reset</a></p> |
| <p><b>Section B: Your Experience Over the Last 10 years.</b></p>                                              |                                                                                                                                                                                                                                                     |
| <p><b>For each of the following types of transport or entertainment please indicate:</b></p>                  |                                                                                                                                                                                                                                                     |
| <p><b>8. Over the Last 10 years (approximately), how often you Travelled or experienced (tick boxes):</b></p> |                                                                                                                                                                                                                                                     |
| <p><b>Cars</b></p>                                                                                            | <p> <input type="radio"/> Never<br/> <input type="radio"/> 1 to 4 trips<br/> <input type="radio"/> 5 to 10 trips<br/> <input type="radio"/> 11+ trips         </p> <p style="text-align: right;"><a href="#">reset</a></p>                          |
| <p><b>Busses or Coaches</b></p>                                                                               | <p> <input type="radio"/> Never<br/> <input type="radio"/> 1 to 4 trips<br/> <input type="radio"/> 5 to 10 trips<br/> <input type="radio"/> 11+ trips         </p> <p style="text-align: right;"><a href="#">reset</a></p>                          |
| <p><b>Trains</b></p>                                                                                          | <p> <input type="radio"/> Never<br/> <input type="radio"/> 1 to 4 trips<br/> <input type="radio"/> 5 to 10 trips<br/> <input type="radio"/> 11+ trips         </p> <p style="text-align: right;"><a href="#">reset</a></p>                          |
|                                                                                                               |                                                                                                                                                                                                                                                     |

|                                                                                                                                                                                                                                                             |                                                                                                                                                                    |                       |
|-------------------------------------------------------------------------------------------------------------------------------------------------------------------------------------------------------------------------------------------------------------|--------------------------------------------------------------------------------------------------------------------------------------------------------------------|-----------------------|
| <b>Aircrafts</b>                                                                                                                                                                                                                                            | <input type="radio"/> Never<br><input type="radio"/> 1 to 4 trips<br><input type="radio"/> 5 to 10 trips<br><input type="radio"/> 11+ trips                        | <a href="#">reset</a> |
| <b>Small boats</b>                                                                                                                                                                                                                                          | <input type="radio"/> Never<br><input type="radio"/> 1 to 4 trips<br><input type="radio"/> 5 to 10 trips<br><input type="radio"/> 11+ trips                        | <a href="#">reset</a> |
| <b>Ships e.g. Channel Ferries</b>                                                                                                                                                                                                                           | <input type="radio"/> Never<br><input type="radio"/> 1 to 4 trips<br><input type="radio"/> 5 to 10 trips<br><input type="radio"/> 11+ trips                        | <a href="#">reset</a> |
| <b>Swings</b>                                                                                                                                                                                                                                               | <input type="radio"/> Never<br><input type="radio"/> 1 to 4 trips<br><input type="radio"/> 5 to 10 trips<br><input type="radio"/> 11+ trips                        | <a href="#">reset</a> |
| <b>Roundabouts: playgrounds</b>                                                                                                                                                                                                                             | <input type="radio"/> Never<br><input type="radio"/> 1 to 4 trips<br><input type="radio"/> 5 to 10 trips<br><input type="radio"/> 11+ trips                        | <a href="#">reset</a> |
| <b>Funfair Rides, Big Dippers</b>                                                                                                                                                                                                                           | <input type="radio"/> Never<br><input type="radio"/> 1 to 4 trips<br><input type="radio"/> 5 to 10 trips<br><input type="radio"/> 11+ trips                        | <a href="#">reset</a> |
| <p><b>Section B: Your Experience Over the Last 10 years.</b><br/> <b>For each of the following types of transport or entertainment please indicate:</b><br/> <b>9. Over the Last 10 years (approximately), how often you felt sick or nauseated in:</b></p> |                                                                                                                                                                    |                       |
| <b>Cars</b>                                                                                                                                                                                                                                                 | <input type="radio"/> Never<br><input type="radio"/> Rarely<br><input type="radio"/> Sometimes<br><input type="radio"/> Frequently<br><input type="radio"/> Always | <a href="#">reset</a> |
|                                                                                                                                                                                                                                                             |                                                                                                                                                                    |                       |

|                                   |                                                                                                                                                                    |                       |
|-----------------------------------|--------------------------------------------------------------------------------------------------------------------------------------------------------------------|-----------------------|
| <b>Busses or Coaches</b>          | <input type="radio"/> Never<br><input type="radio"/> Rarely<br><input type="radio"/> Sometimes<br><input type="radio"/> Frequently<br><input type="radio"/> Always | <a href="#">reset</a> |
| <b>Trains</b>                     | <input type="radio"/> Never<br><input type="radio"/> Rarely<br><input type="radio"/> Sometimes<br><input type="radio"/> Frequently<br><input type="radio"/> Always | <a href="#">reset</a> |
| <b>Aircraft</b>                   | <input type="radio"/> Never<br><input type="radio"/> Rarely<br><input type="radio"/> Sometimes<br><input type="radio"/> Frequently<br><input type="radio"/> Always | <a href="#">reset</a> |
| <b>Small Boats</b>                | <input type="radio"/> Never<br><input type="radio"/> Rarely<br><input type="radio"/> Sometimes<br><input type="radio"/> Frequently<br><input type="radio"/> Always | <a href="#">reset</a> |
| <b>Ships e.g. Channel Ferries</b> | <input type="radio"/> Never<br><input type="radio"/> Rarely<br><input type="radio"/> Sometimes<br><input type="radio"/> Frequently<br><input type="radio"/> Always | <a href="#">reset</a> |
| <b>Swings</b>                     | <input type="radio"/> Never<br><input type="radio"/> Rarely<br><input type="radio"/> Sometimes<br><input type="radio"/> Frequently<br><input type="radio"/> Always | <a href="#">reset</a> |
| <b>Roundabouts: playgrounds</b>   | <input type="radio"/> Never<br><input type="radio"/> Rarely<br><input type="radio"/> Sometimes<br><input type="radio"/> Frequently<br><input type="radio"/> Always | <a href="#">reset</a> |
|                                   |                                                                                                                                                                    |                       |

|                                                                                                                                                                                                                                    |                                                                                                                                                                    |                       |
|------------------------------------------------------------------------------------------------------------------------------------------------------------------------------------------------------------------------------------|--------------------------------------------------------------------------------------------------------------------------------------------------------------------|-----------------------|
| <b>Funfair Rides, Big Dippers</b>                                                                                                                                                                                                  | <input type="radio"/> Never<br><input type="radio"/> Rarely<br><input type="radio"/> Sometimes<br><input type="radio"/> Frequently<br><input type="radio"/> Always | <a href="#">reset</a> |
| <b>Section B: Your Experience Over the Last 10 years.</b><br><b>For each of the following types of transport or entertainment please indicate:</b><br><b>10. Over the Last 10 years (approximately), how often you vomited in:</b> |                                                                                                                                                                    |                       |
| <b>Cars</b>                                                                                                                                                                                                                        | <input type="radio"/> Never<br><input type="radio"/> Rarely<br><input type="radio"/> Sometimes<br><input type="radio"/> Frequently<br><input type="radio"/> Always | <a href="#">reset</a> |
| <b>Busses or Coaches</b>                                                                                                                                                                                                           | <input type="radio"/> Never<br><input type="radio"/> Rarely<br><input type="radio"/> Sometimes<br><input type="radio"/> Frequently<br><input type="radio"/> Always | <a href="#">reset</a> |
| <b>Trains</b>                                                                                                                                                                                                                      | <input type="radio"/> Never<br><input type="radio"/> Rarely<br><input type="radio"/> Sometimes<br><input type="radio"/> Frequently<br><input type="radio"/> Always | <a href="#">reset</a> |
| <b>Aircraft</b>                                                                                                                                                                                                                    | <input type="radio"/> Never<br><input type="radio"/> Rarely<br><input type="radio"/> Sometimes<br><input type="radio"/> Frequently<br><input type="radio"/> Always | <a href="#">reset</a> |
| <b>Small Boats</b>                                                                                                                                                                                                                 | <input type="radio"/> Never<br><input type="radio"/> Rarely<br><input type="radio"/> Sometimes<br><input type="radio"/> Frequently<br><input type="radio"/> Always | <a href="#">reset</a> |
| <b>Ships e.g. Channel Ferries</b>                                                                                                                                                                                                  | <input type="radio"/> Never<br><input type="radio"/> Rarely<br><input type="radio"/> Sometimes<br><input type="radio"/> Frequently<br><input type="radio"/> Always | <a href="#">reset</a> |



|                                                                   |                                                                                                                                                                    |       |
|-------------------------------------------------------------------|--------------------------------------------------------------------------------------------------------------------------------------------------------------------|-------|
| <b>Swings</b>                                                     | <input type="radio"/> Never<br><input type="radio"/> Rarely<br><input type="radio"/> Sometimes<br><input type="radio"/> Frequently<br><input type="radio"/> Always | reset |
| <b>Roundabouts: playgrounds</b>                                   | <input type="radio"/> Never<br><input type="radio"/> Rarely<br><input type="radio"/> Sometimes<br><input type="radio"/> Frequently<br><input type="radio"/> Always | reset |
| <b>Funfair Rides, Big Dippers</b>                                 | <input type="radio"/> Never<br><input type="radio"/> Rarely<br><input type="radio"/> Sometimes<br><input type="radio"/> Frequently<br><input type="radio"/> Always | reset |
| <b>11. Does your Mother experience motion sickness?</b>           | <input type="radio"/> Yes<br><input type="radio"/> No<br><input type="radio"/> Unknown                                                                             | reset |
| <b>12. Does your Father experience motion sickness?</b>           | <input type="radio"/> Yes<br><input type="radio"/> No<br><input type="radio"/> Unknown                                                                             | reset |
| <b>13. Does your Grandmother experience motion sickness?</b>      | <input type="radio"/> Yes<br><input type="radio"/> No<br><input type="radio"/> Unknown                                                                             | reset |
| <b>14. Does your Grandfather experience motion sickness?</b>      | <input type="radio"/> Yes<br><input type="radio"/> No<br><input type="radio"/> Unknown                                                                             | reset |
| <b>15a. How many brothers do you have?</b>                        | <input type="text"/>                                                                                                                                               |       |
| <b>15a. How many of your brothers experience motion sickness?</b> | <input type="text"/>                                                                                                                                               |       |
| <b>15b. How many sisters do you have?</b>                         | <input type="text"/>                                                                                                                                               |       |
| <b>15b. How many of your sisters experience motion sickness?</b>  | <input type="text"/>                                                                                                                                               |       |



|                                                                                                                                                                                         |                                                                                                                                                                                                                                                                                                                                             |
|-----------------------------------------------------------------------------------------------------------------------------------------------------------------------------------------|---------------------------------------------------------------------------------------------------------------------------------------------------------------------------------------------------------------------------------------------------------------------------------------------------------------------------------------------|
| <p><b>5. Choose the 4th most accurate description of your dizziness</b></p>                                                                                                             | <p> <input type="radio"/> Room Spinning<br/> <input type="radio"/> Feels like you are on a boat<br/> <input type="radio"/> Lightheaded<br/> <input type="radio"/> Imbalance<br/> <input type="radio"/> Problems focusing with<br/> <input type="radio"/> head movement         </p> <p style="text-align: right;"><a href="#">reset</a></p> |
| <p><b>Choose the 5th most accurate description of your dizziness.</b></p>                                                                                                               | <p> <input type="radio"/> Room Spinning<br/> <input type="radio"/> Feels like you are on a boat<br/> <input type="radio"/> Lightheaded<br/> <input type="radio"/> Imbalance<br/> <input type="radio"/> Problems focusing with<br/> <input type="radio"/> head movement         </p> <p style="text-align: right;"><a href="#">reset</a></p> |
| <p><b>How long do your episodes of dizziness typically last?</b></p>                                                                                                                    | <p> <input type="radio"/> Seconds<br/> <input type="radio"/> Minutes<br/> <input type="radio"/> Hours<br/> <input type="radio"/> Days<br/> <input type="radio"/> Weeks         </p> <p style="text-align: right;"><a href="#">reset</a></p>                                                                                                 |
| <p><b>Be specific about the previous questions with a numeric number. For example, if your episodes last 10 seconds, choose seconds in the previous question and write 10 here.</b></p> | <input style="width: 100%; height: 20px;" type="text"/>                                                                                                                                                                                                                                                                                     |
| <p><b>7. Did your dizziness start after head trauma or brain surgery?</b></p>                                                                                                           | <p> <input type="radio"/> Yes<br/> <input type="radio"/> No         </p> <p style="text-align: right;"><a href="#">reset</a></p>                                                                                                                                                                                                            |
| <p><b>8. Do you have dizziness when you look up?</b></p>                                                                                                                                | <p> <input type="radio"/> Yes<br/> <input type="radio"/> No         </p> <p style="text-align: right;"><a href="#">reset</a></p>                                                                                                                                                                                                            |
| <p><b>9. Do you experience motion sickness?</b></p>                                                                                                                                     | <p> <input type="radio"/> Yes<br/> <input type="radio"/> No         </p> <p style="text-align: right;"><a href="#">reset</a></p>                                                                                                                                                                                                            |
| <p><b>9a. Did you ever experience motion sickness as a passenger in a car including childhood?</b></p>                                                                                  | <p> <input type="radio"/> Yes<br/> <input type="radio"/> No         </p> <p style="text-align: right;"><a href="#">reset</a></p>                                                                                                                                                                                                            |
| <p><b>9b. Do you experience dizziness or headaches when watching 3-D movies?</b></p>                                                                                                    | <p> <input type="radio"/> Yes<br/> <input type="radio"/> No         </p> <p style="text-align: right;"><a href="#">reset</a></p>                                                                                                                                                                                                            |
| <p><b>10. Have you ever experienced head/ brain fog (i.e. feelings of mental confusion or lack of mental clarity)?</b></p>                                                              | <p> <input type="radio"/> Yes<br/> <input type="radio"/> No         </p> <p style="text-align: right;"><a href="#">reset</a></p>                                                                                                                                                                                                            |
|                                                                                                                                                                                         |                                                                                                                                                                                                                                                                                                                                             |

|                                                                                                                                                                                 |                                                                                                                                                                                                                                             |
|---------------------------------------------------------------------------------------------------------------------------------------------------------------------------------|---------------------------------------------------------------------------------------------------------------------------------------------------------------------------------------------------------------------------------------------|
| <p><b>11. Do you experience dizziness with headaches?</b></p>                                                                                                                   | <p> <input type="radio"/> Always<br/> <input type="radio"/> Sometimes<br/> <input type="radio"/> Never         </p> <p style="text-align: right;"><a href="#">reset</a></p>                                                                 |
| <p><b>12. Have you suffered from headaches in the past year?</b></p>                                                                                                            | <p> <input type="radio"/> Yes<br/> <input type="radio"/> No         </p> <p style="text-align: right;"><a href="#">reset</a></p>                                                                                                            |
| <p><b>13. When did you experience your first headache episode? Please write an approximate month and year.</b></p>                                                              | <input type="text"/>                                                                                                                                                                                                                        |
| <p><b>14. How often do you experience headaches? X times per:</b></p>                                                                                                           | <p> <input type="radio"/> day<br/> <input type="radio"/> week<br/> <input type="radio"/> month<br/> <input type="radio"/> year         </p> <p style="text-align: right;"><a href="#">reset</a></p>                                         |
| <p><b>14. Please estimate the amount of X in the previous question:</b></p>                                                                                                     | <input type="text"/>                                                                                                                                                                                                                        |
| <p><b>15. How long do your headaches typically last? ____:</b></p>                                                                                                              | <p> <input type="radio"/> seconds<br/> <input type="radio"/> minutes<br/> <input type="radio"/> hours<br/> <input type="radio"/> days<br/> <input type="radio"/> weeks         </p> <p style="text-align: right;"><a href="#">reset</a></p> |
| <p><b>15. Please fill in the blank in the previous question. For example, if you have 10 minute headaches, write 10 here and choose headaches in the previous question.</b></p> | <input type="text"/>                                                                                                                                                                                                                        |
| <p><b>16. How would you describe the pain of the headaches?</b></p>                                                                                                             | <p> <input type="radio"/> mild<br/> <input type="radio"/> moderate<br/> <input type="radio"/> severe         </p> <p style="text-align: right;"><a href="#">reset</a></p>                                                                   |
| <p><b>17. Did your headache start after head trauma or brain surgery?</b></p>                                                                                                   | <p> <input type="radio"/> Yes<br/> <input type="radio"/> No         </p> <p style="text-align: right;"><a href="#">reset</a></p>                                                                                                            |
| <p><b>18. Do your headaches get worse with Menstrual periods?</b></p>                                                                                                           | <p> <input type="radio"/> Yes<br/> <input type="radio"/> No<br/> <input type="radio"/> Not applicable         </p> <p style="text-align: right;"><a href="#">reset</a></p>                                                                  |
| <p><b>18. Do your headaches get worse with birth control?</b></p>                                                                                                               | <p> <input type="radio"/> No<br/> <input type="radio"/> Yes<br/> <input type="radio"/> not applicable         </p> <p style="text-align: right;"><a href="#">reset</a></p>                                                                  |

|                                                                                                   |                                                                                                                                                                                    |                       |
|---------------------------------------------------------------------------------------------------|------------------------------------------------------------------------------------------------------------------------------------------------------------------------------------|-----------------------|
| <b>18. Do your headaches get worse with certain food?</b>                                         | <input type="radio"/> Yes<br><input type="radio"/> No                                                                                                                              | <a href="#">reset</a> |
| <b>18. Do your headaches get worse with sleep disturbances?</b>                                   | <input type="radio"/> Yes<br><input type="radio"/> No                                                                                                                              | <a href="#">reset</a> |
| <b>18. Do your headaches get worse with physical activity?</b>                                    | <input type="radio"/> Yes<br><input type="radio"/> No                                                                                                                              | <a href="#">reset</a> |
| <b>18. Do your headaches get worse with Bowel movements (e.g. diarrhea or constipation)</b>       | <input type="radio"/> Yes<br><input type="radio"/> No                                                                                                                              | <a href="#">reset</a> |
| <b>19. Where is the headache located? (check all that apply):</b>                                 | <input type="checkbox"/> Right side<br><input type="checkbox"/> Left side<br><input type="checkbox"/> Forehead<br><input type="checkbox"/> Temple<br><input type="checkbox"/> Back |                       |
| <b>20. Have you experienced neck stiffness?</b>                                                   | <input type="radio"/> Yes<br><input type="radio"/> No                                                                                                                              | <a href="#">reset</a> |
| <b>21. Do you experience ear pain? If so where.</b>                                               | <input type="radio"/> Right<br><input type="radio"/> Left<br><input type="radio"/> Both<br><input type="radio"/> No                                                                | <a href="#">reset</a> |
| <b>22. Have you ever experienced recurrent sinus headaches?</b>                                   | <input type="radio"/> Yes<br><input type="radio"/> No                                                                                                                              | <a href="#">reset</a> |
| <b>23. Have you ever experienced ice cream headaches (i.e. brain-freeze)?</b>                     | <input type="radio"/> Yes<br><input type="radio"/> No                                                                                                                              | <a href="#">reset</a> |
| <b>24. Has wind or air conditioning ever caused you sinus pain, facial pressure, or headache?</b> | <input type="radio"/> Yes<br><input type="radio"/> No                                                                                                                              | <a href="#">reset</a> |
| <b>25. Do you find relief of your headaches with medications?</b>                                 | <input type="radio"/> Yes<br><input type="radio"/> No                                                                                                                              | <a href="#">reset</a> |
| <b>26. Do your headaches reduce your productivity at work or school?</b>                          | <input type="radio"/> Yes<br><input type="radio"/> No                                                                                                                              | <a href="#">reset</a> |

|                                                                                                                                                            |                                                                                                                                                 |                       |
|------------------------------------------------------------------------------------------------------------------------------------------------------------|-------------------------------------------------------------------------------------------------------------------------------------------------|-----------------------|
| <b>27. Do your headaches interfere with your daily life activities (e.g. chores at home)?</b>                                                              | <input type="radio"/> Yes<br><input type="radio"/> No                                                                                           | <a href="#">reset</a> |
| <b>28. Have you ever been prescribed medication for migraine?</b>                                                                                          | <input type="radio"/> Yes<br><input type="radio"/> No                                                                                           | <a href="#">reset</a> |
| <b>29. Do you experience Pulsating or throbbing pain before/during/after your headaches? Check all that apply.</b>                                         | <input type="checkbox"/> Before<br><input type="checkbox"/> During<br><input type="checkbox"/> After<br><input type="checkbox"/> Not applicable |                       |
| <b>29. Do you experience Visual loss, black spots or flashing lights lasting at least 15 min before/during/after your headaches? Check all that apply.</b> | <input type="checkbox"/> Before<br><input type="checkbox"/> During<br><input type="checkbox"/> After<br><input type="checkbox"/> Not applicable |                       |
| <b>29. Do you experience weakness before/during/after your headaches? Check all that apply.</b>                                                            | <input type="checkbox"/> Before<br><input type="checkbox"/> During<br><input type="checkbox"/> After<br><input type="checkbox"/> Not applicable |                       |
| <b>29. Do you experience difficulty speaking before/during/after your headaches? Check all that apply.</b>                                                 | <input type="checkbox"/> Before<br><input type="checkbox"/> During<br><input type="checkbox"/> After<br><input type="checkbox"/> Not applicable |                       |
| <b>29. Do you experience nausea before/during/after your headaches? Check all that apply.</b>                                                              | <input type="checkbox"/> Before<br><input type="checkbox"/> During<br><input type="checkbox"/> After<br><input type="checkbox"/> Not applicable |                       |
| <b>29. Do you experience vomiting before/during/after your headaches? Check all that apply.</b>                                                            | <input type="checkbox"/> Before<br><input type="checkbox"/> During<br><input type="checkbox"/> After<br><input type="checkbox"/> Not applicable |                       |
| <b>29. Do you experience sensitivity to light before/during/after your headaches? Check all that apply.</b>                                                | <input type="checkbox"/> Before<br><input type="checkbox"/> During<br><input type="checkbox"/> After<br><input type="checkbox"/> Not applicable |                       |
|                                                                                                                                                            |                                                                                                                                                 |                       |

|                                                                                                                     |                                                                                                                                                                                                                                                                                                                                                                                        |
|---------------------------------------------------------------------------------------------------------------------|----------------------------------------------------------------------------------------------------------------------------------------------------------------------------------------------------------------------------------------------------------------------------------------------------------------------------------------------------------------------------------------|
| <p><b>29. Do you experience Sensitivity to sounds before/during/after your headaches? Check all that apply.</b></p> | <p><input type="checkbox"/> Before<br/> <input type="checkbox"/> During<br/> <input type="checkbox"/> After<br/> <input type="checkbox"/> Not applicable</p>                                                                                                                                                                                                                           |
| <p><b>29. Do you experience Drowsiness before/during/after your headaches? Check all that apply.</b></p>            | <p><input type="checkbox"/> Before<br/> <input type="checkbox"/> During<br/> <input type="checkbox"/> After<br/> <input type="checkbox"/> Not applicable</p>                                                                                                                                                                                                                           |
| <p><b>29. Do you experience Unsteadiness before/during/after your headaches? Check all that apply.</b></p>          | <p><input type="checkbox"/> Before<br/> <input type="checkbox"/> During<br/> <input type="checkbox"/> After<br/> <input type="checkbox"/> Not applicable</p>                                                                                                                                                                                                                           |
| <p><b>29. Do you experience lightheadedness before/during/after your headaches? Check all that apply.</b></p>       | <p><input type="checkbox"/> Before<br/> <input type="checkbox"/> During<br/> <input type="checkbox"/> After<br/> <input type="checkbox"/> Not applicable</p>                                                                                                                                                                                                                           |
| <p><b>29. Do you Feel like you are on a boat before/during/after your headaches? Check all that apply.</b></p>      | <p><input type="checkbox"/> Before<br/> <input type="checkbox"/> During<br/> <input type="checkbox"/> After<br/> <input type="checkbox"/> Not applicable</p>                                                                                                                                                                                                                           |
| <p><b>29. Do you experience feeling "off" before/during/after your headaches? Check all that apply.</b></p>         | <p><input type="checkbox"/> Before<br/> <input type="checkbox"/> During<br/> <input type="checkbox"/> After<br/> <input type="checkbox"/> Not applicable</p>                                                                                                                                                                                                                           |
| <p><b>30. Do you ever experience pain with light touch on your scalp or face?</b></p>                               | <p><input type="radio"/> Yes<br/> <input type="radio"/> No</p> <p style="text-align: right;"><a href="#">reset</a></p>                                                                                                                                                                                                                                                                 |
| <p><b>31. Have you ever had your balance system tested? (ie. ENG, VNG, etc.)</b></p>                                | <p><input type="radio"/> Yes<br/> <input type="radio"/> No</p> <p style="text-align: right;"><a href="#">reset</a></p>                                                                                                                                                                                                                                                                 |
| <p><b>32. Have you ever been told that you have:</b></p>                                                            | <p><input type="checkbox"/> Migraines<br/> <input type="checkbox"/> Irritable Bowel Syndrome <input type="checkbox"/><br/> <input type="checkbox"/> Meniere's Disease<br/> <input type="checkbox"/> Benign positional vertigo <input type="checkbox"/><br/> <input type="checkbox"/> Gluten Hypersensitivity<br/> <input type="checkbox"/> Celiac Disease <input type="checkbox"/></p> |

|                                                                                                                                                                          |                                                                                                                                                                                                                                                                                                                                                                                                                                                                                                                        |
|--------------------------------------------------------------------------------------------------------------------------------------------------------------------------|------------------------------------------------------------------------------------------------------------------------------------------------------------------------------------------------------------------------------------------------------------------------------------------------------------------------------------------------------------------------------------------------------------------------------------------------------------------------------------------------------------------------|
| <p><b>33. Does anyone in your immediate family have a history of:</b></p>                                                                                                | <p><input type="checkbox"/> Migraines<br/> <input type="checkbox"/> Meniere's Disease<br/> <input type="checkbox"/> Motion Sickness</p>                                                                                                                                                                                                                                                                                                                                                                                |
| <p><b>34. Do you have dizziness when you are: check all that apply.</b></p>                                                                                              | <p><input type="checkbox"/> Lying down<br/> <input type="checkbox"/> Sitting up<br/> <input type="checkbox"/> Standing up<br/> <input type="checkbox"/> Turning your head<br/> <input type="checkbox"/> Walking<br/> <input type="checkbox"/> Hearing loud noises<br/> <input type="checkbox"/> In a car or moving vehicle<br/> <input type="checkbox"/> Walking in a supermarket aisle<br/> <input type="checkbox"/> Motion<br/> <input type="checkbox"/> Medication<br/> <input type="checkbox"/> Not applicable</p> |
| <p><b>35. Are you sensitive to any of the following? (check all that apply):</b></p>                                                                                     | <p><input type="checkbox"/> Lights<br/> <input type="checkbox"/> Weather changes<br/> <input type="checkbox"/> Smells<br/> <input type="checkbox"/> Excess motion on TV or computer<br/> <input type="checkbox"/> Excess motion in a movie theater<br/> <input type="checkbox"/> Sounds<br/> <input type="checkbox"/> Not applicable</p>                                                                                                                                                                               |
| <p><b>36. Do you experience Sensation of objects moving around you before, during, or after your dizziness episodes? Check all that apply.</b></p>                       | <p><input type="checkbox"/> Before<br/> <input type="checkbox"/> During<br/> <input type="checkbox"/> After<br/> <input type="checkbox"/> Not applicable</p>                                                                                                                                                                                                                                                                                                                                                           |
| <p><b>36. Do you experience Spinning sensation when stationary before, during, or after your dizziness episodes? Check all that apply</b></p>                            | <p><input type="checkbox"/> Before<br/> <input type="checkbox"/> During<br/> <input type="checkbox"/> After<br/> <input type="checkbox"/> Not applicable</p>                                                                                                                                                                                                                                                                                                                                                           |
| <p><b>36. Do you experience Ear pressure or fullness (not relieved by popping your ears) before, during, or after your dizziness episodes? Check all that apply.</b></p> | <p><input type="checkbox"/> Before<br/> <input type="checkbox"/> During<br/> <input type="checkbox"/> After<br/> <input type="checkbox"/> Not applicable</p>                                                                                                                                                                                                                                                                                                                                                           |
| <p><b>36. Do you experience Ringing or buzzing in your ears before, during, or after your dizziness episodes? Check all that apply.</b></p>                              | <p><input type="checkbox"/> Before<br/> <input type="checkbox"/> During<br/> <input type="checkbox"/> After<br/> <input type="checkbox"/> Not applicable</p>                                                                                                                                                                                                                                                                                                                                                           |
| <p></p>                                                                                                                                                                  | <p></p>                                                                                                                                                                                                                                                                                                                                                                                                                                                                                                                |



|                                                                                                                                        |                                                                                                                                                                                                                                                    |
|----------------------------------------------------------------------------------------------------------------------------------------|----------------------------------------------------------------------------------------------------------------------------------------------------------------------------------------------------------------------------------------------------|
| <p><b>36. Do you experience Pulsing sound in your ears before, during, or after your dizziness episodes? Check all that apply.</b></p> | <p> <input type="checkbox"/> Before<br/> <input type="checkbox"/> During<br/> <input type="checkbox"/> After<br/> <input type="checkbox"/> Not applicable         </p>                                                                             |
| <p><b>36. Do you experience Hearing loss before, during, or after your dizziness episodes? Check all that apply.</b></p>               | <p> <input type="checkbox"/> Before<br/> <input type="checkbox"/> During<br/> <input type="checkbox"/> After<br/> <input type="checkbox"/> Not applicable         </p>                                                                             |
| <p><b>36. Do you experience Nausea/ Vomiting before, during, or after your dizziness episodes? Check all that apply.</b></p>           | <p> <input type="checkbox"/> Before<br/> <input type="checkbox"/> During<br/> <input type="checkbox"/> After<br/> <input type="checkbox"/> Not applicable         </p>                                                                             |
| <p><b>36. Do you experience Fatigue before, during, or after your dizziness episodes? Check all that apply.</b></p>                    | <p> <input type="checkbox"/> Before<br/> <input type="checkbox"/> During<br/> <input type="checkbox"/> After<br/> <input type="checkbox"/> Not applicable         </p>                                                                             |
| <p><b>36. Do you experience Unsteadiness/ Imbalance before, during, or after your dizziness episodes? Check all that apply.</b></p>    | <p> <input type="checkbox"/> Before<br/> <input type="checkbox"/> During<br/> <input type="checkbox"/> After<br/> <input type="checkbox"/> Not applicable         </p>                                                                             |
| <p><b>36. Do you experience Headache before, during, or after your dizziness episodes? Check all that apply.</b></p>                   | <p> <input type="checkbox"/> Before<br/> <input type="checkbox"/> During<br/> <input type="checkbox"/> After<br/> <input type="checkbox"/> Not applicable         </p>                                                                             |
| <p><b>36. Do you experience Anxiety before, during, or after your dizziness episodes? Check all that apply.</b></p>                    | <p> <input type="checkbox"/> Before<br/> <input type="checkbox"/> During<br/> <input type="checkbox"/> After<br/> <input type="checkbox"/> Not applicable         </p>                                                                             |
| <p><b>37. If you experienced any of the above symptoms, how long did they last?</b></p>                                                | <p> <input type="radio"/> Minutes<br/> <input type="radio"/> Hours<br/> <input type="radio"/> Days<br/> <input type="radio"/> Weeks<br/> <input type="radio"/> Not applicable         </p> <p style="text-align: right;"><a href="#">reset</a></p> |
| <div style="border: 1px solid black; padding: 5px; display: inline-block;"><b>Submit</b></div>                                         |                                                                                                                                                                                                                                                    |
